1 **Title page**

2

3 **Role of DCP1-DCP2 complex regulated by viral and host microRNAs**  
4 **in DNA virus infection**

5

6 Yuechao Sun, Xiaobo Zhang\*

7 *College of Life Sciences and Laboratory for Marine Biology and Biotechnology of*

8 *Qingdao National Laboratory for Marine Science and Technology, Zhejiang*

9 *University, Hangzhou 310058, People's Republic of China*

10

11

12 \* Corresponding author: Prof Xiaobo Zhang

13 Tel: 86-571-88981129

14 Fax: 86-571-88981151

15 Email: zxb0812@zju.edu.cn

16

17

18

19

20

21

22

## 23 **Abstract**

24 The DCP1-DCP2 complex can regulate the animal antiviral immunity by the  
25 decapping of retrovirus RNAs and the suppression of RNAi pathway. However, the  
26 influence of DCP1-DCP2 complex on DNA virus infection and the regulation of  
27 DCP1-DCP2 complex by microRNAs (miRNAs) remain unclear. In this study, we  
28 investigated the role of miRNA-regulated DCP1-DCP2 complex in DNA virus  
29 infection. Our results suggested that the DCP1-DCP2 complex played a positive role  
30 in the infection of white spot syndrome virus (WSSV), a DNA virus of shrimp. The  
31 N-terminal regulatory domain of DCP2 was interacted with the EVH1 domain of  
32 DCP1, forming the DCP1-DCP2 complex. Furthermore, a host shrimp miRNA  
33 (miR-87) inhibited WSSV infection by targeting the host DCP2 gene and a viral  
34 miRNA (WSSV-miR-N46) took a negative effect on WSSV replication by targeting  
35 the host DCP1 gene. Therefore, our study provided novel insights into the underlying  
36 mechanism of DCP1-DCP2 complex and its regulation by miRNAs in virus-host  
37 interactions.

38 The DCP1-DCP2 complex can regulate the animal antiviral immunity by the  
39 decapping of retrovirus RNAs and the suppression of RNAi pathway. In the present  
40 study, the findings indicated that the silencing of the DCP1-DCP2 complex inhibited  
41 the infection of WSSV, a DNA virus of shrimp, suggesting that the DCP1-DCP2  
42 complex facilitated DNA virus infection. Due to the suppressive role of the  
43 DCP1-DCP2 complex in RNAi pathway against virus infection, the DCP1-DCP2  
44 complex could promote WSSV infection in shrimp. In this context, our study  
45 contributed a novel aspect of the DCP1-DCP2 complex in virus-host interactions. Our  
46 study revealed that the host and viral miRNAs could regulate the DCP1-DCP2  
47 complex to affect virus infection. Therefore, our study provided novel insights into

48 the miRNA-mediated regulation of DCP1-DCP2 complex took great effects on RNAi  
49 immunity of invertebrates against virus infection.

50 Key words: DCP1-DCP2 complex; miRNA; DNA virus infection

51

52

53

54

55

56

57

58

59

## 60 **Introduction**

61 Classical virus infection in the host cell is initiated by interactions between viral  
62 capsid or envelope proteins and host cell surface receptors. The internalization of  
63 virions is either through the fusion of the viral envelope and the host plasma  
64 membrane, or through the endocytosis pathway, causing the virions to escape from  
65 the endocytosa or other small vesicles and enter the cytoplasm (1). Cell receptors  
66 attached to the host can directly trigger conformational changes in the surface  
67 structure of the virus or activate specific signaling pathways that facilitate the entry of  
68 the virus (1). The life cycle of a virus begins with the entry of the host cell. Replication  
69 of viral genomes, synthesis of viral proteins, assembly of viral particles, and release of  
70 viruses from host cells depend largely on host mechanisms (1, 2). It is reported that  
71 the stability of viral mrna is regulated by the dcp1-dcp2 complex located in the  
72 P-body (the processing bodies) (3, 4). The DCP1-DCP2 complex can trigger mRNA

73 decapping. DCP2 catalyzed dissection releases m7G and a single 5' phosphorylated  
74 mRNA. This is considered to be an irreversible process, and the target is that mRNA is  
75 degraded by exonuclease Xrn1, 5' to 3' (5). DCP2 protein contains n-terminal  
76 Nudix/MutT motifs, which are usually present in pyrophosphatase and are essential  
77 for decapping (4, 6). Except for the DCP2-DCP1 complex, Pat1 (Decapping activator  
78 and translation repressor) (7-10), Dhh1 (Decapping activator and translation repressor)  
79 (10-13) and the Lsm1-7 complex (Decapping activator) (10, 12, 14) are involved in  
80 the decapping of mRNAs. At present, the decapping of retrovirus RNAs by the  
81 DCP2-DCP1 complex has been well characterized (3, 4). However, the role of  
82 DCP1-DCP2 complex in DNA virus infection remains unclear.

83 Although the DCP1-DCP2 complex affects the mRNA stability, the regulation of  
84 DCP1-DCP2 complex mediated by microRNAs (miRNAs) has not been extensively  
85 explored. During many eukaryotic cellular processes the miRNA pathway is essential,  
86 in especial as virus-host interaction, development, apoptosis, immune response,  
87 tumorigenesis and homeostasis (15-17). Primary miRNAs (pri-miRNAs) and  
88 precursor-miRNAs (pre-miRNAs) are the essential steps of miRNAs in cell nucleus  
89 (18-20). After being transported into cytoplasm, pre-miRNAs are processed by Dicer,  
90 producing ~ 22 bp mature miRNA duplexes. The RNA-induced silencing complex  
91 (RISC) is formed after the loading of the guiding strand of miRNA onto Argonaute  
92 (Ago) protein (18). The target mRNA is bound to the miRNA and then it will be  
93 cleaved by the Ago protein, in the RISC (18). Recently, it has been reported that  
94 phosphorylation and dephosphorylation of Ago2 protein in human body have a  
95 significant impact on the role of miRNA in RISC. (15). In the virus-host interactions,  
96 the gene expressions can be regulated by host and/or virus miRNAs (20-31). In  
97 shrimp, the host miRNAs expression are altered by the infection of white spot

98 syndrome virus (WSSV), a virus with a double-stranded DNA genome (25, 27, 30,  
99 31). Shrimp miR-7 can target the WSSV early gene wsv477, thus inhibiting virus  
100 infection (17), while a viral miRNA can target the shrimp caspase 8 gene to suppress  
101 the host antiviral apoptosis (25). It has been reported that virus-originated mirnas  
102 promote viral latency during viral infection through RNA editing (32). At present,  
103 however, the influence of miRNA-mediated regulation of the DCP1-DCP2 complex  
104 on virus infection remains to be investigated.

105 To address the influence of DCP1-DCP2 complex on DNA virus infection and the  
106 role of the miRNA-regulated DCP1-DCP2 complex in virus infection, shrimp and  
107 WSSV miRNAs targeting the DCP1-DCP2 complex were characterized in this study.  
108 The results indicated that shrimp miR-87 and viral WSSV-miR-N46 (a viral miRNA)  
109 could suppress virus infection by targeting the DCP1-DCP2 complex.

## 110 **Materials and methods**

### 111 **Shrimp culture and WSSV challenge**

112 Shrimp (*Marsupenaeus japonicus*), 10 to 12 cm in length, were cultured in groups  
113 of 20 individuals in the tank filled with seawater at 25°C (23). To ensure that shrimp  
114 were virus-free before experiments, PCR using WSSV-specific primers (5'-TATTGT  
115 CTC TCCTGACGTAC-3' and 5'-CACATTCTTCACGAGTCTAC-3') was  
116 performed to detect WSSV in shrimp (23). The virus-free shrimp were infected with  
117 WSSV inoculum ( $10^5$  copies/ml) by injection at 100  $\mu$ l/shrimp into the lateral area of  
118 the fourth abdominal segment of shrimp (23). At different time postinfection, three  
119 shrimp were randomly collected for each treatment. The shrimp hemocytes were  
120 collected for later use.

### 121 **Analysis of WSSV copies with quantitative real-time PCR**

122 The genomic DNA of WSSV was extracted with a SQ tissue DNA kit (Omega  
123 Bio-tek, Norcross, GA, USA) according to the manufacturer's instruction. The  
124 extracted DNA was analyzed by quantitative real-time PCR with WSSV-specific  
125 primers and WSSV-specific TaqMan probe (5'-FAM-TGCTGCCGTCTCCAA  
126 -TAMRA-3') as described previously (Huang et al, 2014) (23). The PCR procedure  
127 was 95°C for 1 min, followed by 40 cycles of 95°C for 30 s, 52°C of 30 s, and 72°C  
128 for 30 s (23).

### 129 **Detection of mRNA or miRNA by Northern blotting**

130 The RNA was extracted from shrimp hemocytes with mirVana miRNA isolation  
131 kit (Ambion, USA). After separation on a denaturing 15% polyacrylamide gel  
132 containing 7M urea, the RNA was transferred to a Hybond-N+ nylon membrane,  
133 followed by ultraviolet cross-linking (23). The membrane was prehybridized in DIG  
134 (digoxigenin) Easy Hyb granule buffer (Roche, Basel, Switzerland) for 0.5 h at 42°C  
135 and then hybridized with DIG-labeled miR-87 (5'-GAGGGGAAAAGCCATACGCT  
136 TA-3'), WSSV-miR-N46 (5'-AGUGCCAAGAUACGGUUGAAG-3'), U6 (5'-GG  
137 GCCATGCTAATCTTCTCTGTATCGTT-3'), wsv477 (5'-CGAT TTCGGCAGGC  
138 CAGTTGTCAGA-3'), DCP2 (5'-CCAGAAACCCTGAACTAAGAGAA-3') or actin  
139 (5'-CTCGCTCGGCGGTGGTCGTGAAGG-3') probe at 42 °C overnight (23).  
140 Subsequently the detection was performed with the DIG High Prime DNA labeling  
141 and detection starter kit II (Roche).

### 142 **Silencing or overexpression of miR-87 or WSSV-miR-N46 in shrimp**

143 To knock down miR-87 or WSSV-miR-N46, an anti-miRNA oligonucleotide  
144 (AMO) was injected into WSSV-infected shrimp (23). AMO-miR-87  
145 (5'-TGTACGTTTC TGGAGC-3') and AMO-WSSV-miR-N46

146 (5'-CTTCAACCGTTATCTTGGCACT -3') were synthesized (Sangon Biotech,  
147 Shanghai, China) with a phosphorothioate backbone and a 2'-O-methyl modification  
148 at the 12th nucleotide. AMO (10 nM) and WSSV ( $10^5$  copies/ml) were co-injected  
149 into virus-free shrimp at a 100  $\mu$ l/shrimp (23). At 16 h after the co-injection, AMO (10  
150 nM) was injected into the same shrimp. As controls, AMO-miR-87-scrambled  
151 (5'-TTGCATGTCTGTCGAG-3'), AMO-WSSV- miR-N46-scrambled  
152 (5'-TTGCATGTCTGTCGAG-3'), WSSV alone ( $10^5$  copies/ml) and phosphate  
153 buffered saline (PBS) were included in the injections. To overexpress miR-87 or  
154 WSSV-miR-N46, the synthesized miR-87 (5'-TAAGCGTAT GGCTTTTCCCCTC-3')  
155 (10 nM) or WSSV-miR-N46 (5'- AGTGCCAAGATAACG GTTGAAG-3') and  
156 WSSV ( $10^5$  copies/ml) were co-injected into shrimp. As controls, miR-87-scrambled  
157 (5'-TATCGCATAGGCTTTTCCCCTC-3'), WSSV-miR-N46- scrambled  
158 (5'-ATTTGACAGATGCCTAGTACCAG-3'), WSSV alone ( $10^5$  copies/ml) and PBS  
159 were used (23). The miRNAs were synthesized by Sangon Biotech (Shanghai, China).

160 At different time after treatment with AMO or miRNA, three shrimp were  
161 collected at random for each treatment. The shrimp hemocytes were collected for later  
162 use. At the same time, the cumulative mortality of shrimp was examined daily. All the  
163 experiments were biologically repeated three times.

#### 164 **Prediction of miRNA target genes**

165 To predict the target genes of a miRNA, four independent computational  
166 algorithms including TargetScan 5.1 (<http://www.targetscan.org>), miRanda (<http://www.microrna.org/>), Pictar (<http://www.pictar.mdc-berlin.de/>) and miRInspector  
167 (<http://www.Imbb.Forth.gr/microinspector>) were used (23). The overlapped genes  
168 predicted by the four algorithms were the potential targets of the miRNA.  
169

#### 170 **Cell culture, transfection and fluorescence assays**

171 Insect High Five cells (Invitrogen, USA) were cultured with Express Five  
172 serum-free medium (Invitrogen) containing L-glutamine (Invitrogen) at 27°C (23). To  
173 determine the dosage of a synthesized miRNA, 10, 50, 100, 200, 500 or 1000 pM of  
174 miRNA was transfected into cells (23). Then the miRNA expression in cells was  
175 detected with quantitative real-time PCR. It was indicated that the transfection of  
176 miRNA at 100 pM or more could overexpress miRNA in cells. The insect cells were  
177 co-transfected with EGFP, EGFP-DCP2-3'UTR, EGFP-ΔDCP2-3'UTR,  
178 EGFP-DCP1-3'UTR or EGFP-ΔDCP1-3'UTR and miRNA (miR-87 or  
179 WSSV-miR-N46). All the miRNAs were synthesized by Shanghai GenePharma Co.,  
180 Ltd (Shanghai, China). At 48h after co-transfection, the fluorescence intensity of cells  
181 was evaluated with a Flex Station II microplate reader (Molecular Devices, USA)  
182 at 490/510 nm excitation/emission (Ex/Em) (23). The experiments were biologically  
183 repeated three times.

#### 184 **Western blot analysis**

185 Shrimp tissues were homogenized with a lysis buffer (50 mM Tris-HCl, 150 mM  
186 NaCl, 0.1% SDS, 1% Triton X-100, 1 mM phenylmethylsulfonyl fluoride, pH7.8) and  
187 then centrifuged at 10,000×g for 10 min at 4°C. The proteins were separated by  
188 12.5% SDS-polyacrylamide gel electrophoresis and then transferred onto a  
189 nitrocellulose membrane. The membrane was blocked with 5% non-fat milk in TBST  
190 (10 mM Tris-HCl, 150 mM NaCl, 20% Tween 20, pH7.5) for 2 h at room temperature,  
191 followed by incubation overnight with a primary antibody. The antibodies were  
192 prepared in our laboratory. After washes with TBST, the membrane was incubated  
193 with horseradish peroxidase-conjugated secondary antibody (Bio-Rad, USA) for 2 h  
194 at room temperature. Subsequently the membrane was detected using a Western  
195 Lightning Plus-ECL kit (Perkin Elmer, USA).



## 196 **RNAi (RNA interference) assay in shrimp**

197 To silence gene expression in shrimp, RNAi assay was conducted. The small  
198 interfering RNA (siRNA) specifically targeting the *DCP1* or *DCP2* gene was  
199 designed with the 3' UTR of the *DCP1* or *DCP2* gene, generating DCP1-siRNA (5'-A  
200 AUCGCAGUUGCUAUGCGUUGGACG-3') or DCP2-siRNA (5'-GCGGAAGAC  
201 CGUGCCCGUAAUAUAA-3'). As a control, the sequence of DCP1-siRNA or  
202 DCP2-siRNA was randomly scrambled (DCP1-siRNA-scrambled, 5'-GACAUUAAG  
203 AUUAUAUAUGG-3'; DCP2-siRNA-scrambled, 5'-CGCCUUCUGGCACGGGCAU  
204 UAUAUU-3'). All the siRNAs were synthesized by the in vitro transcription T7 kit  
205 (TaKaRa, Japan) according to the manufacturer's instructions. The synthesized  
206 siRNAs were quantified by spectrophotometry. The shrimp were co-injected with  
207 WSSV ( $10^4$  copies/shrimp) and siRNA (4nM). PBS and WSSV alone ( $10^4$   
208 copies/shrimp) were included in the injections as controls (23). At 0, 24, 36 and  
209 48 h after infection, the hemocytes of three shrimp, randomly selected from each  
210 treatment, were collected for later use. At the same time, the cumulative mortality of  
211 shrimp was examined daily (23). All the experiments were biologically repeated three  
212 times.

## 213 **Co-immunoprecipitation**

214 Shrimp hemocytes were lysed with ice-cold cell lysis buffer (Beyotime). Then the  
215 lysate was incubated with Protein G-agarose beads (Invitrogen, Carlsbad, CA, USA)  
216 for 2h at room temperature, followed by incubation with DCP2-specific antibody  
217 overnight at 4°C. After washes three times with ice-cold lysis buffer, the  
218 immuno-complex was subjected to SDS-PAGE with Coomassie blue staining. The  
219 proteins were identified with mass spectrometry using a Reflex IV MALDI-TOF mass  
220 spectrometer (Bruker Daltonik, Bremen, USA). The spectra were processed by the

221 Xmass software (Bruker Daltonik, Bremen) and the peak lists of the mass spectra were  
222 used for peptide mass fingerprint analyses with the Mascot software (Matrix Science).

### 223 **Cloning of full-length cDNAs of shrimp *DCP1* and *DCP2* gene**

224 The full-length *DCP1* and *DCP2* cDNAs were obtained by rapid amplification of  
225 cDNA ends (RACE) using a 5'/3' RACE kit (Roche, Indianapolis, IN, USA). RACEs  
226 were conducted according to the manufacturer's instructions using *DCP1*-specific  
227 primers (5'RACE, 5'-CCTGGGACACTTGAAG-3' and 5'-GGGTAAACCAGTGCC  
228 -3'; 3'RACE, 5'-GCCCCACAGTCCCACCCACCT-3' and 5'-CCCAGGAGGAGCA  
229 CCAATCTCA-3') or *DCP2*-specific primers (5'RACE, 5'-GGGAACCATTTCAGT  
230 TGCT-3' and 5'-GCCAGAAACCCTGAACTAAG-3'; 3'RACE, 5'-ATTGGAGAGC  
231 AGTTTGTGAGAC-3' and 5'-TTTACATCATCCCAGGCG-3'). PCR products were  
232 cloned into pMD-19 vector (Takara, Japan) and sequenced.

### 233 **Interactions between *DCP1* and *DCP2* domains**

234 To explore the interaction between *DCP1* and *DCP2* proteins, the full-length and  
235 domain deletion mutants of *DCP1* and *DCP2* were cloned into pIZ/EGFP V5-FLAG  
236 and pIZ/EGFP V5-His (Invitrogen, USA), respectively. The full-length and deletion  
237 mutants of *DCP1* and *DCP2* were amplified by PCR with sequence-specific primers  
238 (full-length *DCP1*, 5'-GGAAGATCTATGCGCTAAGGTTTTATTTGGAAAA  
239 -3' and 5'-CCGCTCGAGTGACTTATCGTCGTCATCCTTGTAATCCAAACAAC  
240 CTTTGATAGAGAGAT-3'; *DCP1* EVH1 domain, 5'-GGAAGATCTATGCGCTA  
241 AGGTTTTATTTGGAAAA-3' and 5'-CCGCTCGAGTGACTTATCGTCGTCATC  
242 CTTGTAATCTATGTCCCCTCCAGGTGCCCA-3'; *DCP1* C-terminal extension  
243 region, 5'-GGAAGATCTGAATGACAAATCAAGTGA-3' and 5'-CCGCTCGAG  
244 TGAATTATCGTCGTCATCCTTGTAATCCAAACAACCTTTGATAGAGAGAT  
245 -3'; full-length *DCP2*, 5'-GGAAGATCTATGGCCCCACCAACAGGTGGAAAA

246 -3' and 5'-TCCCCGCGGTTAATGGTGATGGTGATGATGCCAAGACAGCATC  
247 ACATCGGCCC-3'; DCP2 N-regulatory domain, 5'-CGCGGATCCGATGAAGA  
248 ACCACATTGTTGTGCC-3' and 5'-TCCCCGCGGTTAATGGTGATGGTGATG  
249 ATGCCAAGACAGCATCACATCGGCCC-3'; DCP2 C-terminal divergent region,  
250 5'-CGCGGATCCGATGAAGAACCACATTGTTGTGCC-3' and 5'-TCCCCGCGG  
251 TTAATGGTGATGGTGATGATGCTGGCGGTCAGAGGTACTGGTG-3'; DCP2  
252 Nudix domain, 5'-CG CGGATCCATGGCCCCACCAACAGGTGGAAAA-3' and  
253 5'-TCCCCGCGGCACATTAATTTCCCTTTTGG-3', and 5'-TCCCCGCGGATGG  
254 CCCACCAACAGGTGGAAAA-3' and 5'-TCCCCGCGGTTAATGGTGATGGTG  
255 ATGA TGCCAAGA CAGCATCACATCGGCCC-3').

256 The constructs were co-transfected into insect High Five cells at 70% confluence  
257 using Cellfectin transfection reagent (Invitrogen, USA) according to the  
258 manufacturer's protocol. The cells were cultured at 27 °C in Express Five serum-free  
259 medium (Invitrogen) supplemented with L-glutamine (Invitrogen). At 48 h after  
260 co-transfection, the cells were subjected to immunoprecipitation assays with anti-His  
261 or anti-FLAG antibody, followed by Western blot analysis.

## 262 **Statistical analysis**

263 All the numerical data presented were analyzed by one-way analysis of variance  
264 (ANOVA) to calculate the means and standard deviations of triplicate assays.

265

## 266 **Results**

### 267 **Role of shrimp DCP2 in virus infection**

268 To characterize the role of shrimp DCP2 in virus infection, the expression level of  
269 DCP2 was examined in shrimp in response to WSSV infection. The results indicated

270 that DCP2 was significantly upregulated in virus-challenged shrimp (Fig 1A),  
271 suggesting that DCP2 played an important role in virus infection.

272 To explore the influence of DCP2 silencing on virus infection,  
273 the DCP2 expression was knocked down by sequence-specific DCP2-siRNA in  
274 shrimp (Fig 1B). The results revealed that the DCP2 silencing resulted in significant  
275 decreases of WSSV copies compared with the controls (Fig 1C), showing that DCP2  
276 played an essential role in WSSV infection.

### 277 **Proteins interacted with DCP2**

278 To elucidate the mechanism of DCP2-mediated antiviral immunity in shrimp, the  
279 proteins interacted with DCP2 were characterized. The results of  
280 co-immunoprecipitation assays using shrimp DCP2-specific antibody indicated that  
281 two proteins were obtained compared with the control (Fig 2A). Mass spectrometry  
282 identification revealed that the two proteins were DCP1 and DCP2 (Fig 2A). These  
283 data showed that DCP2 was interacted with DCP1 in shrimp. To confirm the  
284 interaction between DCP1 and DCP2 proteins, the plasmids expressing DCP1 and  
285 DCP2 were co-transfected into insect cells, followed by Co-IP using DCP2-specific  
286 antibody. Western blots revealed that the DCP1 protein was directly interacted with  
287 the DCP2 protein (Fig 2B).

288 To identify which domains of DCP1 and DCP2 were interacted, the deletion  
289 mutants of DCP1 EVH1 domain ( $\Delta$ EVH1, FLAG-tagged), DCP1 C-terminal region  
290 ( $\Delta$ CR, FLAG-tagged), DCP2 N-terminal regulatory domain ( $\Delta$ NRD, His-tagged),  
291 DCP2 Nudix domain ( $\Delta$ ND, His-tagged) and DCP2 C-terminal divergent region  
292 ( $\Delta$ CDR, His-tagged) were constructed, respectively (Fig 2C). The deletion constructs  
293 and the full-length DCP1 (FLAG-tagged) or DCP2 (His-tagged) were co-transfected  
294 into insect cells. The results showed that when insect cells were co-transfected with

295 DCP2  $\Delta$ NRD and full-length DCP1, the DCP1 protein was not detected in the  
296 immunoprecipitated product using His antibody (Fig 2D), showing that DCP1 was  
297 interacted with DCP2 N-terminal regulatory domain. When DCP2 and DCP1  $\Delta$ EVH1  
298 were co-transfected into cells, the DCP2 protein did not exist in the  
299 immunoprecipitated complex (Fig 2E), indicating that DCP2 was interacted with  
300 DCP1 by binding to its EVH1 domain.

301 The above findings indicated that the EVH1 domain of DCP1 was interacted with  
302 the N-terminal regulatory domain of DCP2.

### 303 **Role of shrimp DCP1 in virus infection**

304 To explore the influence of DCP1 on virus infection of shrimp, the expression  
305 profile of DCP1 was examined in hemocytes of WSSV-infected shrimp. The data of  
306 Northern blots and Western blots indicated that the DCP1 expression was  
307 significantly upregulated in shrimp in response to WSSV infection, suggesting the  
308 involvement of DCP1 in virus infection (Fig 3A).

309 In an attempt to assess the role of DCP1 in virus infection, the DCP1 expression  
310 was knocked down by sequence-specific siRNA in WSSV-infected shrimp, followed  
311 by evaluation of virus infection. The results revealed that the expression of DCP1 was  
312 silenced by DCP1-siRNA (Fig 3B). The DCP1 silencing led to significant decreases  
313 of WSSV copies compared with the controls (WSSV and WSSV+DCP1-siRNA-  
314 scrambled) (Fig 3C). These findings indicated that DCP1 played a positive role in  
315 virus infection.

### 316 **Effects of the interaction between shrimp miR-87 and DCP2 on virus infection**

317 To reveal the miRNAs targeting shrimp *DCP2* gene, the miRNAs targeting *DCP2*  
318 were predicted. The prediction data showed that the shrimp *DCP2* gene was a  
319 potential target of miR-87 (Fig 4A). To evaluate the interaction between miR-87 and

320 *DCP2* gene, the plasmid pIZ/EGFP-*DCP2*-3'UTR containing the EGFP and  
321 the *DCP2* 3'UTR was co-transfected with miR-87 into the insect cells. The results  
322 indicated that the fluorescence intensity of the cells co-transfected with miR-87 and  
323 pIZ/EGFP-*DCP2*-3'UTR was significantly decreased compared with the controls (Fig  
324 4B). However, the fluorescence intensity of the cells co-transfected with miR-87 and  
325 EGFP- $\Delta$ *DCP2*-3'UTR was similar to those of the controls (Fig 4B).  
326 These findings revealed that miR-87 was directly interacted with *DCP2* gene. In order  
327 to examine the interaction between miR-87 and *DCP2* gene *in vivo*, miR-87 was  
328 overexpressed in shrimp, followed by the analysis of *DCP2* gene expression. It  
329 was revealed that the miR-87 overexpression led to a significant decrease of *DCP2*  
330 expression at transcript and protein levels compared with the controls (Fig 4C),  
331 indicating that miR-87 was interacted with *DCP2* gene *in vivo*.

332 To explore the role of shrimp miR-87 in virus infection of shrimp, the expression  
333 level of miR-87 was examined in hemocytes of WSSV-infected shrimp. Northern  
334 blots indicated that the host miR-87 expression was significantly downregulated in  
335 shrimp in response to WSSV infection, suggesting that miR-87 played an important  
336 role in the shrimp antiviral immunity (Fig 4D).

337 In order to assess the influence of miR-87 on virus infection, the miR-87  
338 expression was silenced or overexpressed in the WSSV-infected shrimp, followed by  
339 the evaluation of virus infection. The results showed that the expression of miR-87  
340 was knocked down by AMO-miR-87 compared with the controls (Fig 4E). The  
341 miR-87 silencing led to significant increases of WSSV copies and the virus-infected  
342 shrimp mortality compared with the controls (Fig 4F and 4G). On the other hand,  
343 when miR-87 was overexpressed (Fig4H), the WSSV copies and the virus-infected

344 shrimp mortality were significantly decreased compared with the controls (Fig 4G and  
345 4I).

346 Taken the above data together, these findings presented that miR-87 could  
347 inhibit virus infection in shrimp by targeting shrimp *DCP2* gene.

#### 348 **Influence of viral WSSV-miR-N46 targeting *DCP1* on virus infection**

349 To characterize the miRNAs targeting *DCP1*, the viral miRNAs targeting *DCP1*  
350 gene were predicted. The miRNA target prediction showed that the *DCP1* gene might  
351 be the target of WSSV-miR-N46, a viral miRNA encoded by WSSV (Fig 5A). To  
352 validate the target prediction, the synthesized viral miRNA and the plasmid  
353 EGFP-DCP1-3' UTR were co-transfected into insect cells. The results indicated that  
354 the fluorescence intensity of the cells co-transfected with WSSV-miR-N46 and  
355 EGFP-DCP1-3' UTR was significantly decreased compared with that in the controls  
356 (Fig 5B), showing that WSSV-miR-N46 was directly interacted with *DCP1* gene.

357 In an attempt to reveal the role of WSSV-miR-N46 in virus infection, the  
358 expression of WSSV-miR-N46 in WSSV-challenged shrimp was examined. Northern  
359 blotting results indicated that WSSV-miR-N46 was detected at 48 h after virus  
360 infection in shrimp (Fig 5C). Therefore, WSSV-miR-N46 was overexpressed in  
361 shrimp (Fig 5D), followed by evaluation of virus copy. The results revealed that the  
362 WSSV-miR-N46 overexpression significantly decreased the number of WSSV copies  
363 in shrimp (Fig 5E), indicating that WSSV-miR-N46 played a negative role in WSSV  
364 replication.

365 Taken together, the findings revealed that the viral miRNA (WSSV-miR-N46) and  
366 host miRNA (miR-87) suppressed virus infection by targeting the DCP1-DCP2  
367 complex (Fig 5F).

#### 368 **Discussion**

369 As reported, the DCP1-DCP2 complex, localized in processing bodies (P bodies),  
370 can regulate the animal antiviral immunity by two strategies, that is the decapping of  
371 retrovirus RNAs and the suppression of RNAi pathway (32-36). During the process of  
372 retrovirus infection, the canonical mRNA decapping enzyme DCP2, along with its  
373 activator DCP1, could restrict the infection of retrovirus at the level of mRNA  
374 transcription (34, 35). The host DCP1-DCP2 complex directly decapps retrovirus  
375 mRNAs or cellular mRNAs targeted by bunyaviruses for cap-snatching, thus creating  
376 a bottleneck for retrovirus replication (33, 35). During the infection of Sindbis virus  
377 or Venezuelan equine encephalitis virus, the host can inhibit the infection of retrovirus  
378 through the DCP1-DCP2-mediated 5'-3' decay pathway. During the bunyaviruses  
379 infection in the insects and mammals, the bunyaviruses cap their mRNAs at the 5'  
380 ends by the "cap-snatching" machinery in the P bodies (35). The virally encoded  
381 nucleocapsid N protein recognize 5' caps and 10-18 nucleotides (nt) downstream 5'  
382 caps of cellular mRNAs and the viral RNA-dependent RNA polymerase cleaves the  
383 mRNA at the same position. Subsequently the cleaved 5' caps are used for viral  
384 mRNA synthesis (35). Regarding the role of the DCP2-DCP2 complex in RNAi  
385 pathway, it is found that the silencing of DCP2 and/or DCP1 promotes RNAi,  
386 showing that the DCP2-DCP1 complex takes a negative effect on the RNAi pathway  
387 (35, 36). RNAi, an important component of innate immune responses, mediated by  
388 siRNAs or miRNAs, plays crucial roles against virus infection in invertebrates and  
389 plants that rely solely on innate mechanisms to combat viral infection (30, 34, 37). Up  
390 to date, however, little is known about the role of the DCP1-DCP2 complex in DNA  
391 virus infection. In the present study, the findings indicated that the silencing of the  
392 DCP1-DCP2 complex inhibited the infection of WSSV, a DNA virus of shrimp,  
393 suggesting that the DCP1-DCP2 complex facilitated DNA virus infection. Due to the



394 suppressive role of the DCP1-DCP2 complex in RNAi pathway against virus  
395 infection (35, 36), the DCP1-DCP2 complex could promote WSSV infection in  
396 shrimp. In this context, our study contributed a novel aspect of the DCP1-DCP2  
397 complex in virus-host interactions.

398 In the present investigation, the results showed that the host and viral miRNAs  
399 could inhibit the expressions of DCP1 and DCP2 during DNA virus infection.  
400 MiRNAs, a large class of small noncoding RNAs in diverse eukaryotic organisms, are  
401 sequentially processed by two RNase III proteins, Drosha and Dicer from the stem  
402 regions of long hairpin transcripts (28, 37). The mature miRNA strand is liberated  
403 from the miRNA:miRNA\* duplex and integrated into the RNA induced silencing  
404 complex (RISC), and inhibits the expression of cognate mRNA through degradation  
405 or translation repression in the RISC (18). During virus infection the host miRNAs  
406 or/and viral miRNAs can regulate virus infection by targeting viral or/and host genes  
407 (2, 17, 23, 24, 27-29, 31, 32, 38). As well reported, the virus-encoded miRNAs (viral  
408 mRNAs) can target virus and/or host genes, leading to virus infection or virus latency  
409 (29, 32, 38, 39). In shrimp, a viral miRNA WSSV-miR-N12 targets the  
410 virus wsv399 gene, resulting in virus latency (32). The viral miRNA-mediated  
411 regulation of virus infection or virus latency is an efficient strategy for virus to escape  
412 its host immune responses. However, the involvement of miRNA in the degradation  
413 of cellular mRNAs mediated by DCP1-DCP2 complex has not been explored. Our  
414 study revealed that the host and viral miRNAs could regulate the DCP1-DCP2  
415 complex to affect virus infection. Therefore, our study provided novel insights into  
416 the regulatory mechanism of DCP1-DCP2 complex in virus-host interactions and that  
417 the miRNA-mediated regulation of DCP1-DCP2 complex took great effects on RNAi  
418 immunity of invertebrates against virus infection.

419

420

421

422 **Acknowledgements**

423 This work was supported by National Natural Science Foundation of China

424 (31430089) and National Program on the Key Basic Research Project

425 (2015CB755903).

426

427

428

429

430

431

432

433

434 **References:**

435 1. Bhattacharjee S, Chattaraj S. 2017. Entry, infection, replication, and egress of

436 human polyomaviruses: an update. *Can J Microbiol* 63: 193-211.

437 2. Cui Y, Huang X, Wang X, Li Y, Tang C, Wang H, Jiang Y. 2017. Correlation

438 between infection of herpes virus family and liver function parameters: a

439 population-based cross-sectional study. *J Infect Dev Ctries* 11: 320-325.

440 3. Rossi JJ. 2005. RNAi and the P-body connection. *Nat Cell Biol* 7: 643-644.

- 441 4. Chen CY, Zheng D, Xia Z, Shyu AB. 2009. Ago-TNRC6 triggers  
442 microRNA-mediated decay by promoting two deadenylation steps. *Nat Struct Mol*  
443 *Biol* 16: 1160–1166
- 444 5. Schaeffer D, van Hoof A. 2011. Different nuclease requirements for  
445 exosome-mediated degradation of normal and nonstop mRNAs. *Proc Natl Acad Sci U*  
446 *S A* 108: 2366-2371.
- 447 6. Munchel SE, Shultzaberger RK, Takizawa N, Weis K. 2011. Dynamic profiling of  
448 mRNA turnover reveals gene-specific and system-wide regulation of mRNA decay.  
449 *Mol Biol Cell* 22: 2787-2795.
- 450 7. Eulalio A, Behm-Ansmant I, Schweizer D, Izaurralde E. 2007. P-body formation is  
451 a consequence, not the cause, of RNA-mediated gene silencing. *Mol Cell Biol* 27:  
452 3970-3981.
- 453 8. Gallo CM, Munro E, Rasoloson D, Merritt C, Seydoux G. 2008. Processing bodies  
454 and germ granules are distinct RNA granules that interact in *C. elegans* embryos. *Dev*  
455 *Biol* 323: 76-87.
- 456 9. Scheller N, Resa-Infante P, de la Luna S, Galao RP, Albrecht M, Kaestner L, Lipp  
457 P, Lengauer T, Meyerhans A, Diez J. 2007. Identification of PatL1, a human homolog  
458 to yeast P body component Pat1. *Biochim Biophys Acta* 1773: 1786-1792.
- 459 10. Sheth U, Parker R. 2003. Decapping and decay of messenger RNA occur in  
460 cytoplasmic processing bodies. *Science* 300: 805-808.
- 461 11. Barbee SA, Estes PS, Cziko AM, Hillebrand J, Luedeman RA, Collier JM, Johnson  
462 N, Howlett IC, Geng C, Ueda R, Brand AH, Newbury SF, Wilhelm JE, Levine RB,  
463 Nakamura A, Parker R, Ramaswami M. 2006. Staufen- and FMRP-containing neuronal

- 464 RNPs are structurally and functionally related to somatic P bodies. *Neuron* 52:  
465 997-1009.
- 466 12. Gallo RL, Nizet V. 2008. Innate barriers against infection and associated disorders.  
467 *Drug Discov Today Dis Mech* 5: 145-152.
- 468 13. Wilczynska U, Szymczak W, Szeszenia-Dabrowska N. 2005. Mortality from  
469 malignant neoplasms among workers of an asbestos processing plant in Poland:  
470 results of prolonged observation. *Int J Occup Med Environ Health* 18: 313-326.
- 471 14. Stoecklin G, Mayo T, Anderson P. 2006. ARE-mRNA degradation requires the  
472 5'-3' decay pathway. *EMBO Rep* 7: 72-77.
- 473 15. Golden RJ, Chen B, Li T, Braun J, Manjunath H, Chen X, Wu J, Schmid V, Chang  
474 TC, Kopp F, Ramirez-Martinez A, Tagliabracci VS, Chen ZJ, Xie Y, Mendell JT. 2017.  
475 An Argonaute phosphorylation cycle promotes microRNA-mediated silencing. *Nature*  
476 542: 197-202.
- 477 16. Jo MH, Shin S, Jung SR, Kim E, Song JJ, Hohng S. 2015. Human Argonaute 2 Has  
478 Diverse Reaction Pathways on Target RNAs. *Mol Cell* 59: 117-124.
- 479 17. Huang T, Zhang X. 2012. Functional analysis of a crustacean microRNA in  
480 host-virus interactions. *J Virol* 86: 12997-13004.
- 481 18. Jonas S, Izaurralde E. 2015. Towards a molecular understanding of  
482 microRNA-mediated gene silencing. *Nat Rev Genet* 16: 421-433.
- 483 19. Vidigal JA, Ventura A. 2015. The biological functions of miRNAs: lessons from in  
484 vivo studies. *Trends Cell Biol* 25: 137-147.

- 485 20. Yang G, Yang L, Zhao Z, Wang J, Zhang X. 2012. Signature miRNAs involved in  
486 the innate immunity of invertebrates. *PLoS ONE* 7: e39015.
- 487 21. Mendell JT, Olson EN. 2012. MicroRNAs in stress signaling and human disease.  
488 *Cell* 148: 1172-1187.
- 489 22. Zhou Y, He Y, Wang C, Zhang X. 2015. Characterization of miRNAs from  
490 hydrothermal vent shrimp *Rimicaris exoculata*. *Mar Genomics* 24 Pt 3: 371-378.
- 491 23. He Y, Zhang X. 2012. Comprehensive characterization of viral miRNAs involved  
492 in white spot syndrome virus (WSSV) infection. *RNA Biol* 9: 1019-1029.
- 493 24. Huang T, Cui Y, Zhang X. 2018. Correction for Huang et al., "Involvement of  
494 Viral MicroRNA in the Regulation of Antiviral Apoptosis in Shrimp". *J Virol* 92.
- 495 25. Wang Z, Zhu F. 2017. MicroRNA-100 is involved in shrimp immune response to  
496 white spot syndrome virus (WSSV) and *Vibrio alginolyticus* infection. *Sci Rep* 7:  
497 42334.
- 498 26. Ingle H, Kumar S, Raut AA, Mishra A, Kulkarni DD, Kameyama T, Takaoka A,  
499 Akira S, Kumar H. 2015. The microRNA miR-485 targets host and influenza virus  
500 transcripts to regulate antiviral immunity and restrict viral replication. *Sci Signal* 8:  
501 a126.
- 502 27. Shu L, Li C, Zhang X. 2016. The role of shrimp miR-965 in virus infection. *Fish*  
503 *Shellfish Immunol* 54: 427-434.
- 504 28. Ren Q, Huang X, Cui Y, Sun J, Wang W, Zhang X. 2017. Two white spot  
505 syndrome virus microRNAs target the dorsal gene to promote virus infection in

- 506 *Marsupenaeus japonicus* shrimp. J Virol 91 (8): e02261-16. [https://doi.org/](https://doi.org/10.1128/JVI.02261-16)  
507 10.1128/JVI.02261-16.
- 508 29. He Y, Yang K, Zhang X. 2014. Viral microRNAs targeting virus genes promote  
509 virus infection in shrimp in vivo. J Virol 88: 1104-1112.
- 510 30. Huang T, Xu D, Zhang X. 2012. Characterization of host microRNAs that respond  
511 to DNA virus infection in a crustacean. BMC Genomics 13: 159.
- 512 31. Cui Y, Yang X, Zhang X. 2017. Shrimp miR-34 from Shrimp Stress Response to  
513 Virus Infection Suppresses Tumorigenesis of Breast Cancer. Mol Ther Nucleic Acids 9:  
514 387-398.
- 515 32. Cui Y, Huang T, Zhang X. 2015. RNA editing of microRNA prevents  
516 RNA-induced silencing complex recognition of target mRNA. Open Biol 5: 150126.
- 517 33. Gaglia MM, Glaunsinger BA. 2010. Viruses and the cellular RNA decay  
518 machinery. Wiley Interdiscip Rev RNA 1: 47-59.
- 519 34. Hopkins KC, McLane LM, Maqbool T, Panda D, Gordesky-Gold B, Cherry S.  
520 2013. A genome-wide RNAi screen reveals that mRNA decapping restricts bunyaviral  
521 replication by limiting the pools of Dcp2-accessible targets for cap-snatching. Genes  
522 Dev 27: 1511-1525.
- 523 35. Hopkins K, Cherry S. 2013. Bunyaviral cap-snatching vs. decapping: recycling  
524 cell cycle mRNAs. Cell Cycle 12: 3711-3712.
- 525 36. Sheth U, Parker R. 2006. Targeting of aberrant mRNAs to cytoplasmic processing  
526 bodies. Cell 125: 1095-1109.

527 37. Huang T, Zhang X. 2012. Contribution of the argonaute-1 isoforms to invertebrate  
528 antiviral defense. PLoS ONE 7: e50581.

529 38. He Y, Ma T, Zhang X. 2017. The Mechanism of Synchronous Precise Regulation  
530 of Two Shrimp White Spot Syndrome Virus Targets by a Viral MicroRNA. Front  
531 Immunol 8: 1546.

532 39. He Y, Ma T, Zhang X. 2017. The Mechanism of Synchronous Precise Regulation  
533 of Two Shrimp White Spot Syndrome Virus Targets by a Viral MicroRNA. Front  
534 Immunol 8: 1546.

535

536

537

538

539

540

541

542

543

#### 544 **Figure legends**

545 **Fig 1. Role of shrimp DCP2 in virus infection.** (A) Expression level of DCP2 in  
546 shrimp in response to virus infection. Shrimp were challenged with WSSV. At  
547 different times post-infection, the expression level of DCP2 in shrimp hemocytes was  
548 examined by Northern blotting or Western blotting. Shrimp  $\beta$ -actin was used as a  
549 control. Numbers indicated the time post-infection. Probes or antibodies used were  
550 shown on the left. (B) Knockdown of DCP2 by siRNA in shrimp. Shrimp were

551 injected with DCP2-siRNA to silence DCP2 expression. As a control, DCP2-siRNA-  
552 scrambled was included in the injection. At different time after injection,  
553 the *DCP2* mRNA and protein levels were examined by Northern blot and Western  
554 blot, respectively. Actin was used as a control. The probes or antibodies were  
555 indicated on the left. (C) Influence of DCP2 silencing on virus infection in shrimp.  
556 Shrimp were co-injected with DCP2-siRNA and WSSV. At different time  
557 post-infection, the WSSV copies were examined with quantitative real-time PCR (\*,  
558  $p < 0.05$ ; \*\*,  $p < 0.01$ ).

559 **Fig 2. Proteins interacted with DCP2.** (A) The proteins bound to  
560 DCP2. Co-IP using the DCP2-specific antibody was conducted. The eluted proteins  
561 were subjected to SDS-PAGE, followed by protein identification using mass  
562 spectrometry. (B) The interaction between DCP1 and DCP2 proteins. The His-tagged  
563 DCP1 and DCP2 were co-transfected into insect cells. At 48 h after  
564 co-transfection, Co-IP was conducted using DCP2-specific antibody, followed by  
565 Western blot analysis with anti-His IgG. (C) The constructs of DCP1 and DCP2  
566 domain deletion mutants. (D) and (E) The interactions between DCP1 and DCP2  
567 domains. The full-length and/or deletion mutants of DCP1 and DCP2 were  
568 co-transfected into insect cells. At 48 h after transfection, the target proteins were  
569 immunoprecipitated with anti-His (D) or anti-FLAG IgG (E), followed by Western  
570 blot analysis.

571 **Fig 3. Role of shrimp DCP1 in virus infection.** (A) DCP1 expression profile in  
572 shrimp in response to virus infection. Shrimp were challenged with WSSV. At  
573 different times post-infection, the expression of DCP1 was examined in shrimp  
574 hemocytes by Northern blotting or Western blotting. Shrimp  $\beta$ -actin was used as a  
575 control. The numbers indicated the time post-infection. Probes or antibodies used



576 were shown on the left. (B) Silencing of DCP1 in shrimp. Shrimp were injected with  
577 DCP1-siRNA, followed by the detection of DCP1 with Northern blot or Western blot.  
578 The probes or antibodies were indicated on the left. (C) Influence of DCP1 silencing  
579 on virus infection. WSSV and DCP1-siRNA or DCP1-siRNA-scrambled were  
580 co-injected into shrimp. WSSV alone and PBS were used as controls. At different  
581 time after injection, the WSSV copies in shrimp were examined with quantitative  
582 real-time PCR (\*,  $p < 0.05$ ; \*\*,  $p < 0.01$ ).

583 **Fig 4. Effects of the interaction between shrimp miR-87 and DCP2 on virus**  
584 **infection.** (A) Prediction of miRNAs targeting *DCP2*. According to the prediction,  
585 the 3' UTR of *DCP2* gene could be targeted by miR-87. The seed sequence of miR-87  
586 was underlined. (B) Direct interaction between miR-87 and DCP2 3' UTR. The insect  
587 High Five cells were co-transfected with miR-87 and the plasmid  
588 EGFP-DCP2-3'UTR or EGFP-ΔDCP2-3'UTR. At 36 h after co-transfection, the  
589 fluorescence intensity of insect cells was evaluated. Scale bar, 50 μm. (C) Interaction  
590 between miR-87 and DCP2 *in vivo*. MiR-87 was overexpressed in shrimp.  
591 At different time after miR-87 overexpression, the *DCP2* mRNA and protein levels  
592 were examined by Northern blot and Western blot, respectively. As a control,  
593 miR-87-scrambled was included in the assays. Data were representatives of three  
594 independent experiments. The probes or antibodies were indicated on the left. (D)  
595 Expression level of miR-87 in virus-infected shrimp. Shrimp were challenged with  
596 WSSV. At different time post-infection, miR-87 was detected in hemocytes of  
597 virus-infected shrimp by Northern blotting. U6 was used as a control. Probes were  
598 indicated on the left. (E) Silencing of miR-87 expression in shrimp. Shrimp were  
599 co-injected with AMO-miR-87 and WSSV. As a control, AMO-miR-87-scrambled  
600 was included in the injection. At different time post-infection, miR-87 was detected

601 by Northern blot. The probes used were indicated on the left. The numbers showed  
602 the time points post-infection. U6 was used as a control. (F) Influence of  
603 miR-87 silencing on virus copies. WSSV and AMO-miR-87 or AMO-miR-87-  
604 scrambled were co-injected into shrimp. WSSV and PBS were used as controls. At  
605 different time after injection, the WSSV copies in shrimp were examined with  
606 quantitative real-time PCR. (G) Effects of miR-87 silencing or overexpression on  
607 WSSV-infected shrimp mortality. (H) Overexpression of miR-87 in shrimp. Shrimp  
608 were co-injected with miR-87 or miR-87-scrambled and WSSV. At different time  
609 after injection, the shrimp were subjected to Northern blot with probes indicated on  
610 the left. PBS and WSSV were used as controls. (I) Impact of miR-87 overexpression  
611 on WSSV copies. Shrimp were simultaneously injected with miR-87 and WSSV. As a  
612 control, miR-87-scrambled was included in the injection. At different time  
613 post-infection, the virus copies were examined with quantitative real-time PCR. In all  
614 panels, the significant differences between treatments were indicated (\*,  $p < 0.05$ ; \*\*,  
615  $p < 0.01$ ).

616 **Fig 5. Influence of viral WSSV-miR-N46 targeting *DCPI* on virus infection.** (A)  
617 The prediction of viral miRNA targeting *DCPI*. As predicted, the 3' UTR of *DCPI*  
618 was targeted by WSSV-miR-N46, a WSSV-encoded viral miRNA. The seed sequence  
619 was underlined. (B) The direct interaction between WSSV-miR-N46 and *DCPI* gene  
620 in insect cells. Insect High Five cells were co-transfected with WSSV-miR-N46 or  
621 WSSV-miR-N46-scrambled and EGFP, EGFP-*DCPI* 3' UTR or EGFP- $\Delta$ *DCPI* 3'  
622 UTR. At 48 h after co-transfection, the fluorescence of cells was examined (\*\*,  
623  $p < 0.01$ ). Scale bar, 50  $\mu$ m. (C) The expression pattern of WSSV-miR-N46 in shrimp  
624 in response to virus infection. Shrimp were challenged with WSSV. At different time  
625 post-infection, WSSV-miR-N46 was detected by Northern blotting. U6 was used as a

626 control. The number indicated the time points post-infection. Probes were indicated on  
627 the left. (D) The overexpression of WSSV-miR-N46 in shrimp. Shrimp were  
628 simultaneously injected with WSSV and WSSV-miR-N46. As a control,  
629 WSSV-miR-N46-scrambled was included in the injection. At different time  
630 post-infection, shrimp hemolymph was subjected to Northern blotting. U6 was used as  
631 a control. The probes were shown on the right. (E) The influence of WSSV-miR-N46  
632 overexpression on WSSV infection. Shrimp were simultaneously injected with  
633 WSSV-miR-N46 and WSSV. As a control, WSSV-miR-N46-scrambled was included  
634 in the injection. At different time post-infection, the WSSV copies were examined  
635 with quantitative real-time PCR (\*\*,  $p < 0.01$ ). (F) Mode for the miRNA-mediated  
636 signaling pathway in virus infection.

637

638

639

640

641

642

643

644

Fig 1

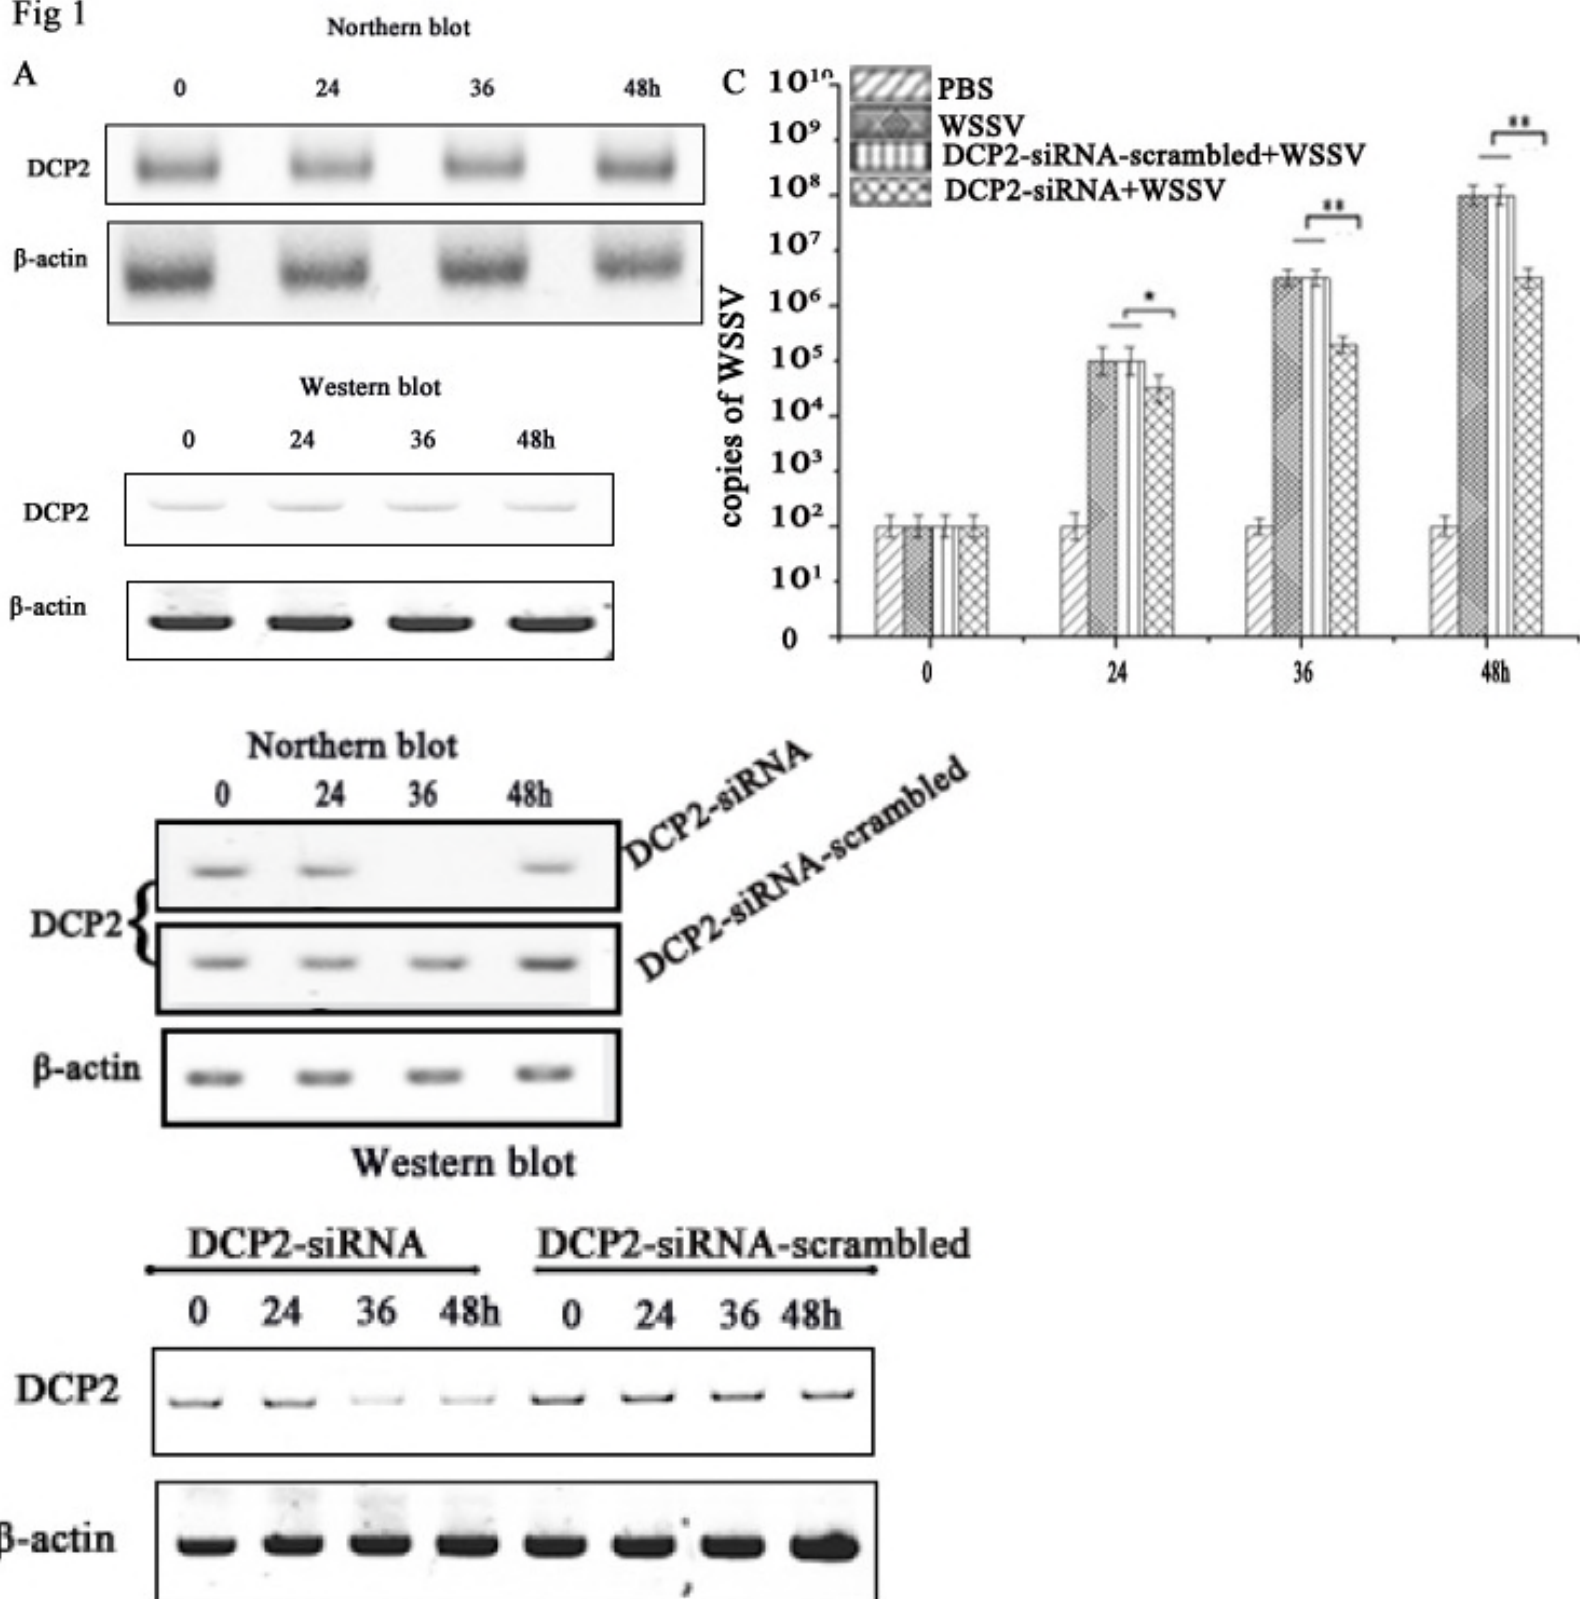

Fig 2

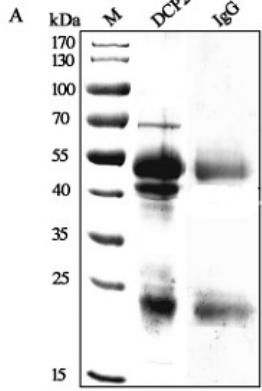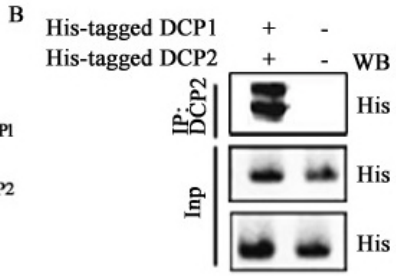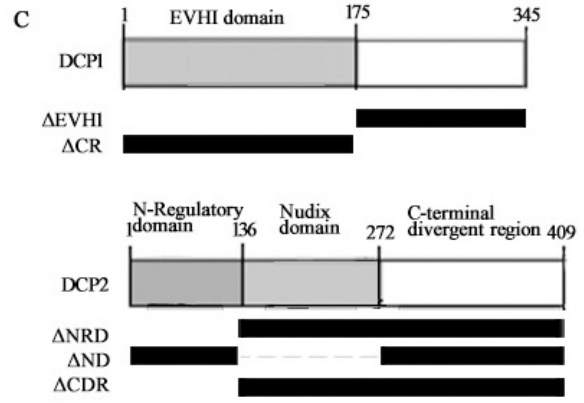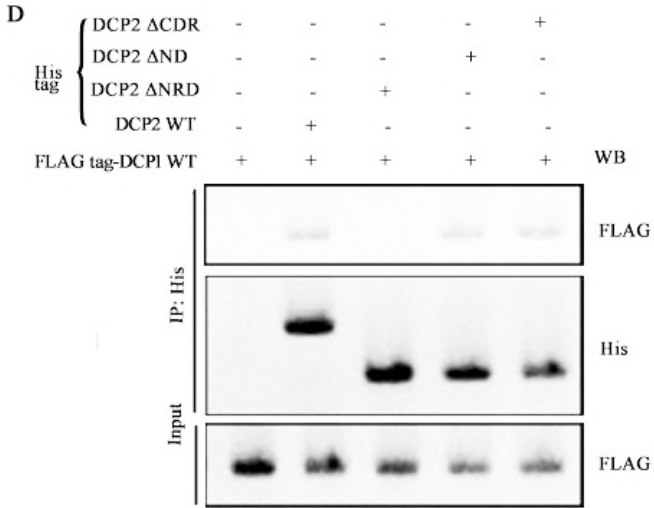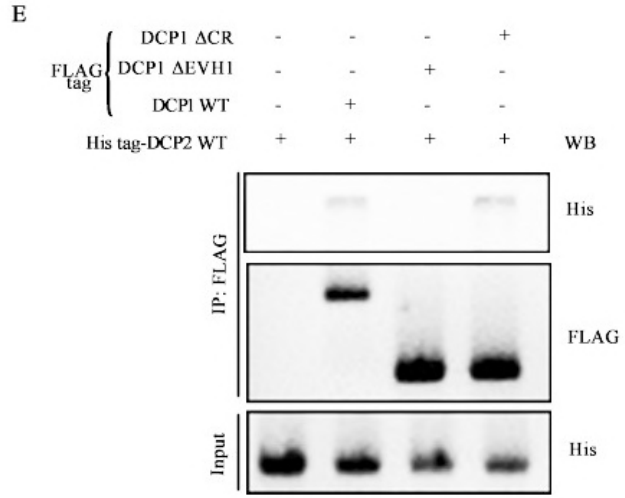

Fig 3

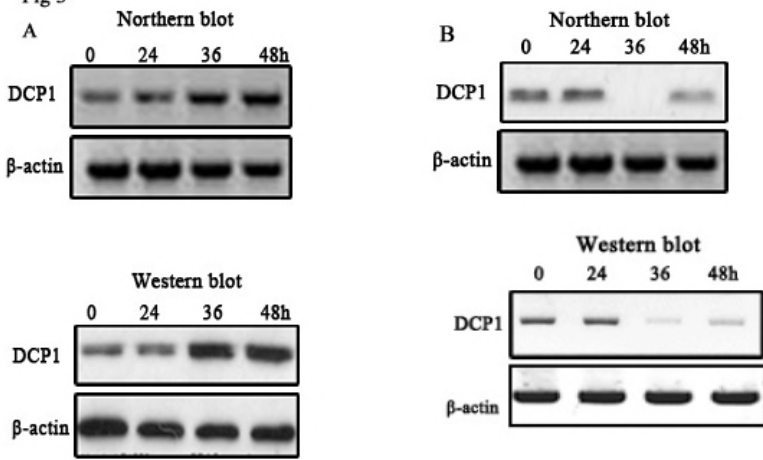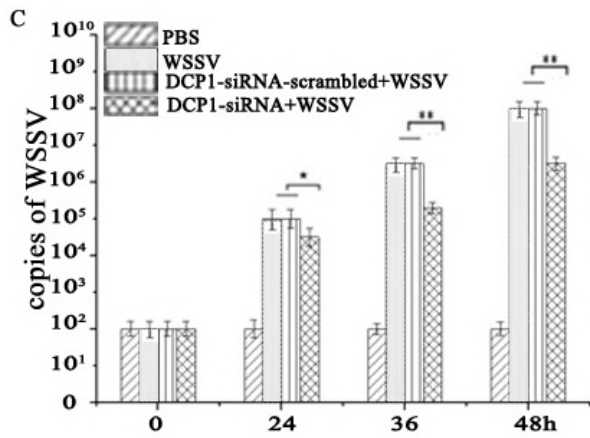

Fig 4

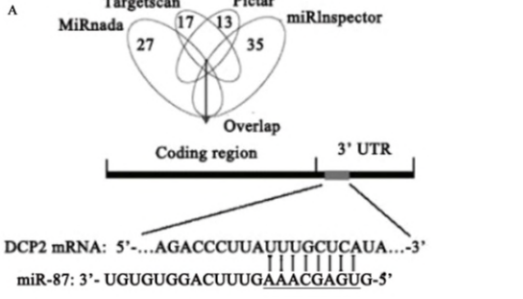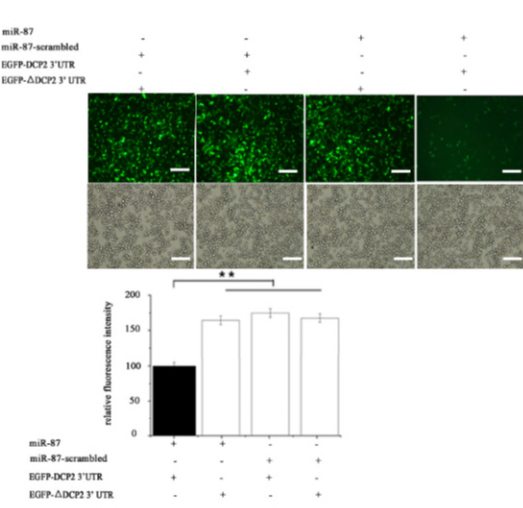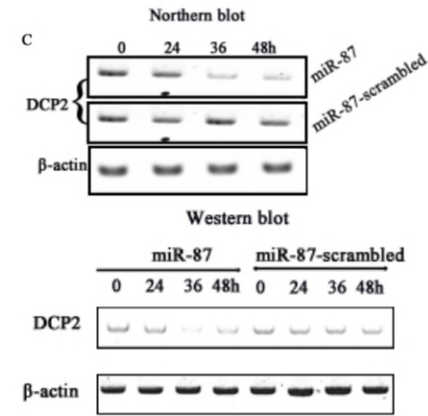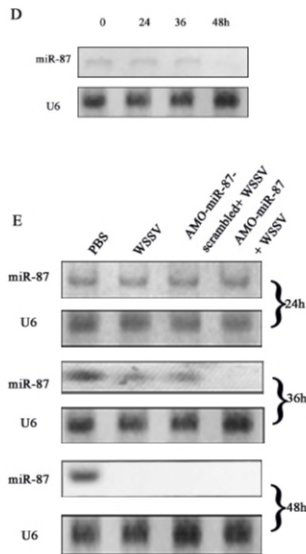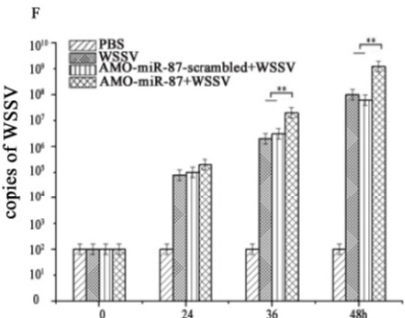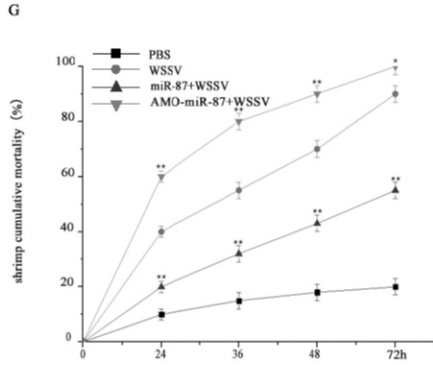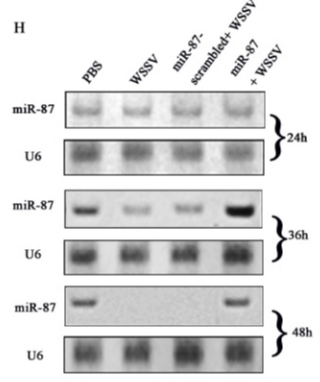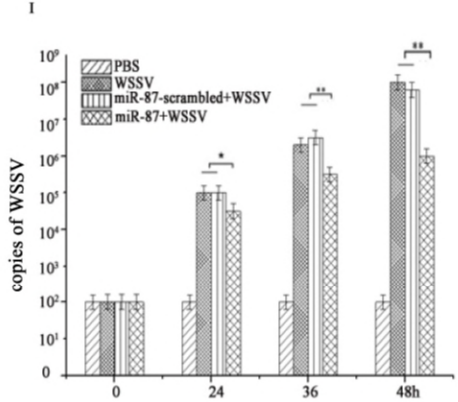



Fig 5

A

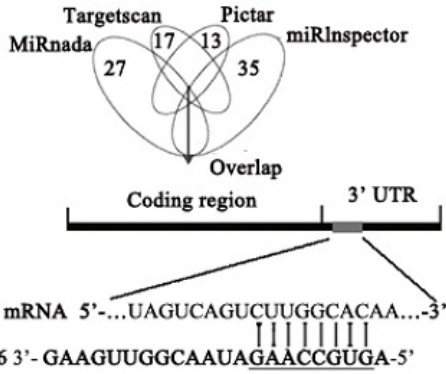

B

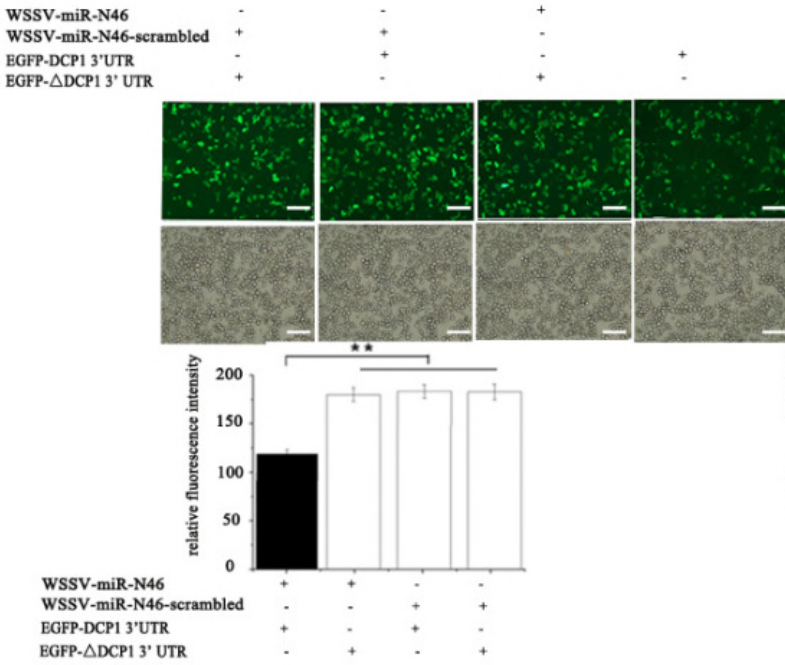

C

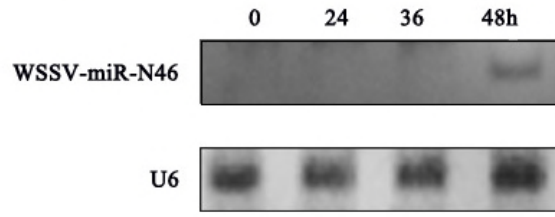

D

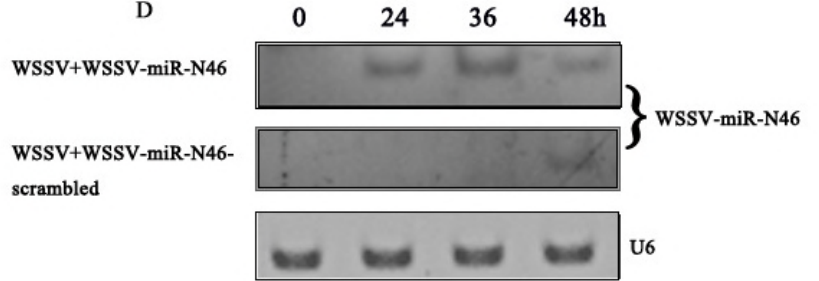

E

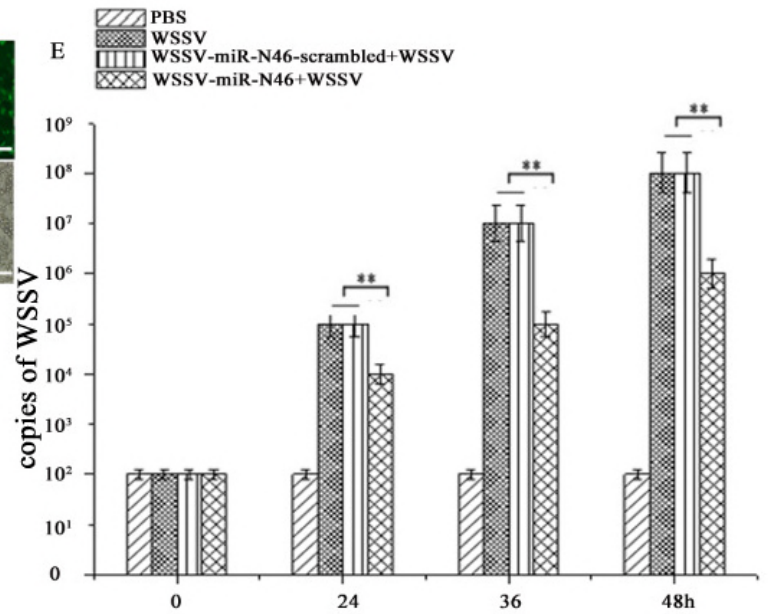

F

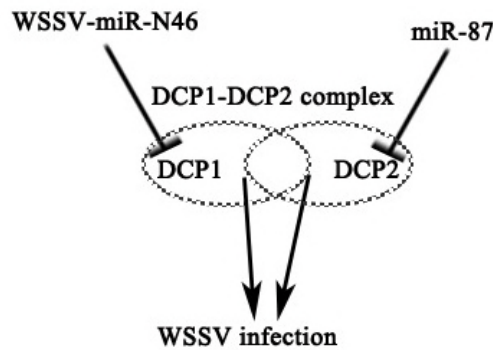

Source: https://www.biorxiv.org/content/10.1101/341362v1.full.pdf
